# Supplementary material for: Predicting surgical resource consumption and in-hospital mortality in resource-scarce conflict settings: a retrospective study
Source: Springer Nature journal article supplement (doi:10.1186/s12873-021-00488-2), 2021-08-11
Supplement: MOESM2 [file 19562558]

**Additional table 2** Relationship between surgical resource consumption, sex, age, vital signs and Red Cross Wound Score (RCWS)

| Surgical resource consumption           | Univariate analysis         |                                         |         | Logistic regression analysis                                  |         |                                                               |         |
|-----------------------------------------|-----------------------------|-----------------------------------------|---------|---------------------------------------------------------------|---------|---------------------------------------------------------------|---------|
|                                         | Complete cases<br>Total=834 |                                         | P value | Complete cases<br>Total=834                                   |         | All cases <sup>a</sup><br>Total=1555 <sup>b</sup>             |         |
|                                         | Low<br>Total=472<br>n (%)   | High <sup>c</sup><br>Total=362<br>n (%) |         | All confounders<br>1=High <sup>c</sup><br>Odds ratio (95% CI) | P value | All confounders<br>1=High <sup>c</sup><br>Odds ratio (95% CI) | P value |
| Sex                                     |                             |                                         | 1.000   |                                                               |         |                                                               |         |
| Male                                    | 418                         | 320 (88.4)                              |         | 1                                                             |         | 1                                                             |         |
| Female                                  | 54 (11.4)                   | 42 (11.6)                               |         | 1.14 (0.68-1.90)                                              | 0.626   | 1.14 (0.79-1.63)                                              | 0.491   |
| Age                                     |                             |                                         | 0.710   |                                                               |         |                                                               |         |
| 15-49 years                             | 433                         | 329 (90.9)                              |         | 1                                                             |         | 1                                                             |         |
| >49                                     | 39 (8.3)                    | 33 (9.1)                                |         | 1.23 (0.70-2.17)                                              | 0.466   | 1.84 (1.26-2.70)                                              | 0.002   |
| Time since injury                       |                             |                                         | 0.152   |                                                               |         |                                                               |         |
| 0-6 hours                               | 15 (3.2)                    | 21 (5.8)                                |         | 1                                                             |         | 1                                                             |         |
| 7-24 hours                              | 203                         | 159 (43.9)                              |         | 0.68 (0.30-1.54)                                              | 0.352   | 1.03 (0.52-2.06)                                              | 0.933   |
| >24 hours                               | 254                         | 182 (50.3)                              |         | 0.66 (0.29-1.52)                                              | 0.327   | 0.97 (0.49-1.95)                                              | 0.938   |
| Systolic blood pressure                 |                             |                                         | 0.004   |                                                               |         |                                                               |         |
| >89 mmHg                                | 464                         | 341 (94.2)                              |         | 1                                                             |         | 1                                                             |         |
| 76-89                                   | 5 (1.1)                     | 10 (2.8)                                |         | 1.16 (0.33-4.11)                                              | 0.931   | 1.52 (0.61-3.75)                                              | 0.362   |
| 0-75                                    | 3 (0.6)                     | 11 (3.0)                                |         | 1.65 (0.44-6.20)                                              | 0.821   | 1.23 (0.51-2.97)                                              | 0.640   |
| Respiratory rate                        |                             |                                         | 0.446   |                                                               |         |                                                               |         |
| 10-29/min                               | 458                         | 347 (95.9)                              |         | 1                                                             |         | 1                                                             |         |
| ≤9                                      | -                           | -                                       |         | -                                                             | -       | -                                                             | -       |
| ≥30                                     | 14 (3.0)                    | 15 (4.1)                                |         | 0.88 (0.37-2.09)                                              | 0.772   | 0.72 (0.42-1.26)                                              | 0.222   |
| Glasgow Coma Scale                      |                             |                                         | 0.077   |                                                               |         |                                                               |         |
| 13-15                                   | 465                         | 347 (95.8)                              |         | 1                                                             |         | 1                                                             |         |
| 9-12                                    | 4 (0.9)                     | 10 (2.8)                                |         | 1.09 (0.31-3.87)                                              | 0.896   | 1.01 (0.19-5.37)                                              | 0.811   |
| 6-8                                     | 2 (0.4)                     | 4 (1.1)                                 |         | 1.60 (0.22-11.65)                                             | 0.644   | 0.85 (0.20-3.59)                                              | 0.825   |
| ≤5                                      | 1 (0.2)                     | 1 (0.3)                                 |         | 0.84 (0.05-15.76)                                             | 0.906   | 0.90 (0.37-2.18)                                              | 0.985   |
| RCWSgrade                               |                             |                                         | <0.001  |                                                               |         |                                                               |         |
| 1 (simple)                              | 266                         | 83 (22.9)                               |         | 1                                                             |         | 1                                                             |         |
| 2 (medium)                              | 185                         | 178 (49.2)                              |         | 2.60 (1.81-3.74)                                              | <0.001  | 2.51 (1.93-3.26)                                              | <0.001  |
| 3 (large)                               | 21 (4.4)                    | 101 (27.9)                              |         | 11.60 (6.61-20.36)                                            | <0.001  | 10.76 (7.41-15.63)                                            | <0.001  |
| RCWS type                               |                             |                                         | <0.001  |                                                               |         |                                                               |         |
| Soft tissue                             | 220                         | 67 (18.5)                               |         | 1                                                             |         | 1                                                             |         |
| Fracture                                | 164                         | 180 (49.7)                              |         | 2.39 (1.62-3.54)                                              | <0.001  | 2.12 (1.60-2.82)                                              | <0.001  |
| Threatening life                        | 59 (12.5)                   | 45 (12.4)                               |         | 2.16 (1.27-3.67)                                              | 0.005   | 1.92 (1.31-2.83)                                              | 0.001   |
| Threatening life/limb                   | 29 (6.1)                    | 70 (19.4)                               |         | 4.67 (2.61-8.34)                                              | <0.001  | 3.05 (2.04-4.54)                                              | <0.001  |
| Additional severe injuries <sup>d</sup> |                             |                                         | <0.001  |                                                               |         |                                                               |         |
| No                                      | 439                         | 288 (79.6)                              |         | 1                                                             |         | 1                                                             |         |
| Yes                                     | 33 (7.0)                    | 74 (20.4)                               |         | 2.90 (1.83-4.89)                                              | <0.001  | 2.43 (1.72-3.44)                                              | <0.001  |

<sup>a</sup>Using imputed data for incomplete cases; <sup>b</sup>9 patients with unknown surgical resource consumption excluded; <sup>c</sup>Defined as ≥3 surgical procedures under anesthesia or ≥3 blood transfusions or limb amputation; <sup>d</sup>Corresponding to Abbreviated Injury Score ≥2
