# Supplementary material for: Predicting surgical resource consumption and in-hospital mortality in resource-scarce conflict settings: a retrospective study
Source: Springer Nature journal article supplement (doi:10.1186/s12873-021-00488-2), 2021-08-11
Supplement: MOESM3 [file 19562558]

**Additional table 3** Relationship between in-hospital mortality, sex, age, vital signs and Red Cross Wound Score (RCWS)

| In-hospital mortality                   | Univariate analysis         |                          |         | Logistic regression analysis                                     |         |                                                                   |         |
|-----------------------------------------|-----------------------------|--------------------------|---------|------------------------------------------------------------------|---------|-------------------------------------------------------------------|---------|
|                                         | Complete cases<br>Total=834 |                          | P value | Complete cases<br>Total=834                                      |         | All cases <sup>a</sup><br>Total=1559 <sup>b</sup>                 |         |
|                                         | No<br>Total=813<br>n (%)    | Yes<br>Total=21<br>n (%) |         | All confounders<br>1=In-hospital mortality<br>Odds ratio (95%CI) | P value | All confounders<br>1=In-hospital mortality<br>Odds ratio (95% CI) | P value |
| Sex                                     |                             |                          | 1.000   |                                                                  |         |                                                                   |         |
| Male                                    | 719 (88.4)                  | 19 (90.0)                |         | 1                                                                |         | 1                                                                 |         |
| Female                                  | 94 (11.6)                   | 2 (10.0)                 |         | 0.82 (0.17-4.04)                                                 | 0.815   | 1.38 (0.65-2.92)                                                  | 0.395   |
| Age                                     |                             |                          | 0.701   |                                                                  |         |                                                                   |         |
| 15-49 years                             | 743 (91.4)                  | 19 (90.5)                |         | 1                                                                |         | 1                                                                 |         |
| >49                                     | 70 (8.6)                    | 2 (9.5)                  |         | 1.48 (0.31-7.00)                                                 | 0.620   | 1.31 (0.60-2.85)                                                  | 0.494   |
| Time since injury                       |                             |                          | 0.010   |                                                                  |         |                                                                   |         |
| 0-6 hours                               | 33 (4.1)                    | 3 (14.3)                 |         | 1                                                                |         | 1                                                                 |         |
| 7-24 hours                              | 354 (43.5)                  | 8 (38.1)                 |         | 0.32 (0.50-1.99)                                                 | 0.222   | 0.37 (0.12-1.16)                                                  | 0.089   |
| >24 hours                               | 426 (52.4)                  | 10 (47.6)                |         | 0.41 (0.07-2.61)                                                 | 0.347   | 0.65 (0.21-2.00)                                                  | 0.451   |
| Systolic blood pressure                 |                             |                          | 0.033   |                                                                  |         |                                                                   |         |
| >89 mmHg                                | 787 (96.8)                  | 18 (85.7)                |         | 1                                                                |         | 1                                                                 |         |
| 76-89                                   | 13 (1.6)                    | 2 (9.5)                  |         | 2.46 (0.26-23.29)                                                | 0.433   | 4.63 (1.59-13.44)                                                 | 0.005   |
| 0-75                                    | 13 (1.6)                    | 1 (4.8)                  |         | 1.04 (0.08-13.41)                                                | 0.978   | 2.34 (0.64-8.65)                                                  | 0.194   |
| Respiratory rate                        |                             |                          | 0.163   |                                                                  |         |                                                                   |         |
| 10-29/min                               | 786 (96.7)                  | 19 (90.5)                |         | 1                                                                |         | 1                                                                 |         |
| ≤9                                      | -                           | -                        |         | -                                                                | -       | 1.90 (0.95-3.80)                                                  | 0.070   |
| ≥30                                     | 27 (3.3)                    | 2 (9.5)                  |         | 3.02 (0.55-16.58)                                                | 0.203   | 3.00 (0.82-11.06)                                                 | 0.097   |
| Glasgow Coma Scale                      |                             |                          | <0.001  |                                                                  |         |                                                                   |         |
| 13-15                                   | 796 (97.9)                  | 16 (76.2)                |         | 1                                                                |         | 1                                                                 |         |
| 9-12                                    | 12 (1.5)                    | 2 (9.5)                  |         | 6.55 (1.00-43.13)                                                | 0.084   | 2.42 (0.27-21.47)                                                 | 0.385   |
| 6-8                                     | 5 (0.6)                     | 1 (4.8)                  |         | 5.25 (0.44-62.71)                                                | 0.190   | 4.41 (0.78-24.75)                                                 | 0.091   |
| ≤5                                      | 0                           | 2 (9.5)                  |         | -                                                                | -       | 2.08 (0.62-6.98)                                                  | 0.233   |
| RCWS grade                              |                             |                          | 0.656   |                                                                  |         |                                                                   |         |
| 1 (simple)                              | 338 (41.6)                  | 11 (52.4)                |         | 1                                                                |         | 1                                                                 |         |
| 2 (medium)                              | 355 (43.7)                  | 8 (38.1)                 |         | 0.56 (0.17-1.78)                                                 | 0.323   | 1.37 (0.73-2.58)                                                  | 0.323   |
| 3 (large)                               | 120 (14.8)                  | 2 (9.5)                  |         | 0.37 (0.07-2.03)                                                 | 0.250   | 1.39 (0.65-2.97)                                                  | 0.400   |
| RCWS type                               |                             |                          | 0.007   |                                                                  |         |                                                                   |         |
| Soft tissue                             | 283 (34.8)                  | 4 (19.0)                 |         | 1                                                                |         | 1                                                                 |         |
| Fracture                                | 339 (41.7)                  | 5 (23.8)                 |         | 1.48 (0.32-6.78)                                                 | 0.612   | 1.12 (0.42-3.00)                                                  | 0.820   |
| Threatening life                        | 98 (12.1)                   | 6 (28.6)                 |         | 3.88 (0.88-17.02)                                                | 0.073   | 10.72 (4.42-26.01)                                                | <0.001  |
| Threatening life/limb                   | 93 (11.4)                   | 6 (28.6)                 |         | 2.89 (0.49-17.12)                                                | 0.241   | 8.43 (3.36-21.18)                                                 | <0.001  |
| Additional severe injuries <sup>c</sup> |                             |                          | 0.174   |                                                                  |         |                                                                   |         |
| No                                      | 711 (87.5)                  | 16 (76.2)                |         | 1                                                                |         | 1                                                                 |         |
| Yes                                     | 102 (12.5)                  | 5 (23.8)                 |         | 2.09 (0.67-6.52)                                                 | 0.204   | 1.41 (0.75-2.65)                                                  | 0.285   |

<sup>a</sup>Using imputed data for incomplete cases; <sup>b</sup>5 patients with unknown discharge status excluded; <sup>c</sup>Corresponding to Abbreviated Injury Score ≥2
